# Supplementary material
Source: PubMed Central journal article supplement (PMC3067286)
Supplement: supp_77_5_1881__1.pdf [file supp_77_5_1881__1.pdf]

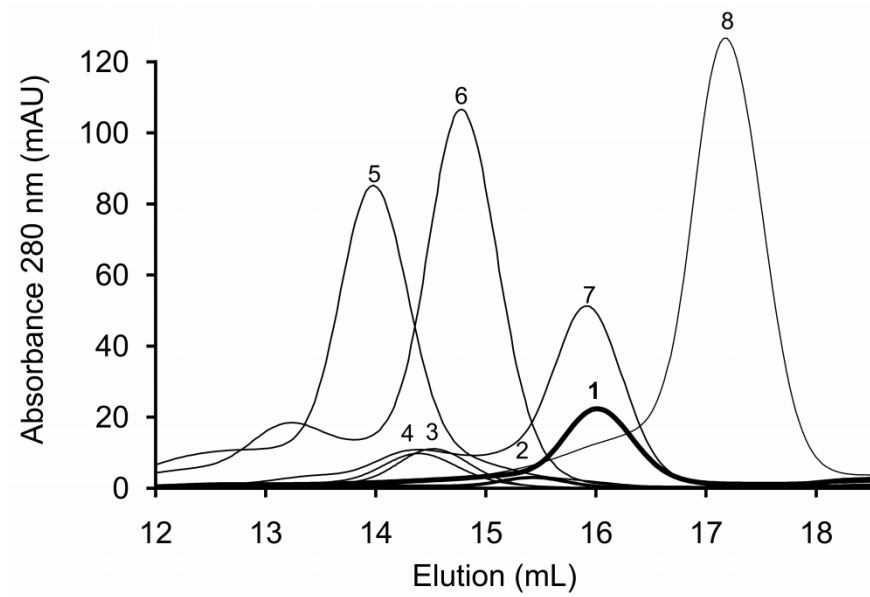

FIG. S2. Gel filtration chromatogram of DatA, DhaA, DbjA, DbeA, and four proteins from the calibration kit. (1) DatA (34 kDa), (2) DhaA (35 kDa), (3) DbjA (30 kDa), (4) DbeA (34 kDa), (5) conalbumin (75 kDa), (6) ovalbumin (67 kDa), (7) carbonic anhydrase (29 kDa), and (8) ribonuclease (14 kDa). All proteins were analyzed at 4°C, using 50 mM Tris-HCl containing 150 mM of NaCl of pH 7.5 as the elution buffer. The concentrations of samples were approximately 2 mg ml<sup>-1</sup>.

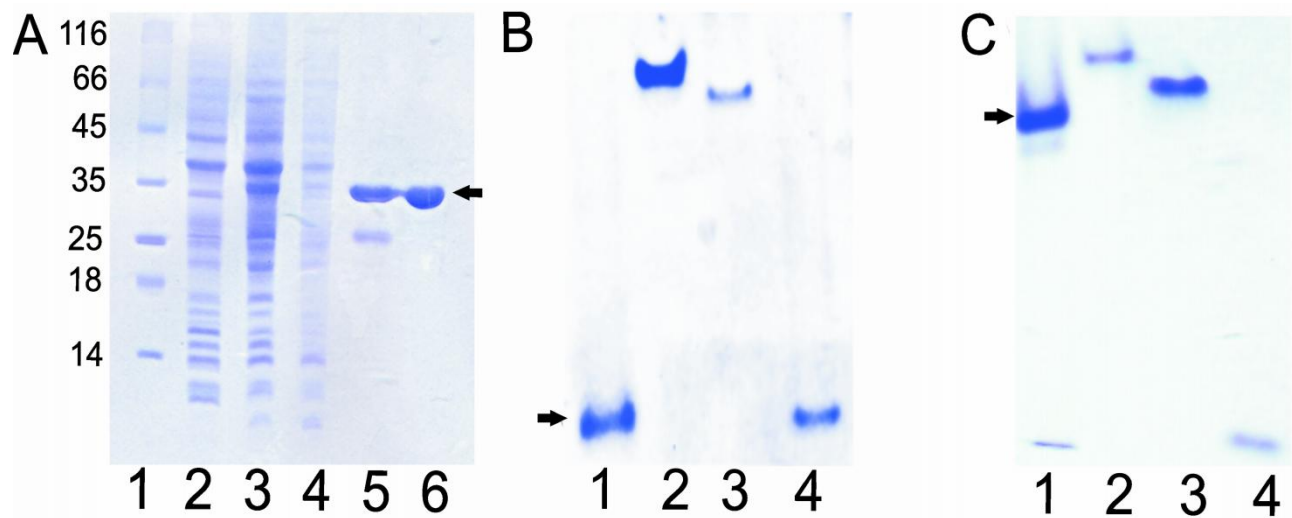

FIG. S3. (A) SDS gel electrophoresis of DatA. Lane 1, molecular weight marker; lane 2, before IPTG induction; lane 3, after IPTG induction; lane 4, crude extract; lane 5, fractions pooled from anion exchange chromatography; and lane 6, fractions pooled from affinity chromatography with Ni-nitrilotriacetic acid. Native gel electrophoresis of DatA (B) with NaCl and (C) without NaCl. Lane 1, DatA; lane 2, DbeA (dimer); lane 3, DbjA (dimer); lane 4, DhaA (monomer). DatA bands are indicated by the arrows.

TABLE S1. Protein sequence identities of biochemically characterized haloalkane dehalogenases.<sup>a</sup>

| Protein     | <b>Data</b> | DhaA      | LinB      | DmbA      | DmlA      | DbjA      | DhmA      | DmbB      | DhlA      | DrbA      | DmbC      |
|-------------|-------------|-----------|-----------|-----------|-----------|-----------|-----------|-----------|-----------|-----------|-----------|
| <b>Data</b> | -           | <b>35</b> | <b>34</b> | <b>34</b> | <b>34</b> | <b>31</b> | <b>23</b> | <b>25</b> | <b>21</b> | <b>22</b> | <b>21</b> |
| DhaA        | <b>35</b>   | -         | 48        | 43        | 49        | 47        | 27        | 27        | 24        | 22        | 25        |
| LinB        | <b>34</b>   | 48        | -         | 68        | 42        | 37        | 25        | 24        | 21        | 24        | 25        |
| DmbA        | <b>34</b>   | 43        | 68        | -         | 37        | 36        | 24        | 24        | 19        | 25        | 24        |
| DmlA        | <b>34</b>   | 49        | 42        | 37        | -         | 55        | 22        | 21        | 20        | 23        | 24        |
| DbjA        | <b>31</b>   | 47        | 37        | 36        | 55        | -         | 21        | 21        | 19        | 19        | 22        |
| DhmA        | <b>23</b>   | 27        | 25        | 24        | 22        | 21        | -         | 82        | 35        | 21        | 28        |
| DmbB        | <b>25</b>   | 27        | 24        | 24        | 21        | 21        | 82        | -         | 35        | 21        | 27        |
| DhlA        | <b>21</b>   | 24        | 21        | 19        | 20        | 19        | 35        | 35        | -         | 20        | 20        |
| DrbA        | <b>22</b>   | 22        | 24        | 25        | 23        | 19        | 21        | 21        | 20        | -         | 25        |
| DmbC        | <b>21</b>   | 25        | 25        | 24        | 24        | 22        | 28        | 27        | 20        | 25        | -         |

<sup>a</sup> Sequence identities are given in %. Data (this study; *Agrobacterium tumefaciens* C58; accession number AB478945), DhaA (Kulakova *et al.* 1997; *Rhodococcus rhodochrous* NCIMB 13064; accession number AAC15838), LinB (Nagata *et al.* 1993; *Spinghobium japonicum* UT26; accession number P51698), DmbA (Jesenska *et al.* 2005; *Mycobacterium bovis* 5033/66; accession number AJ784273), DmlA (Sato *et al.* 2005; *Mesorhizobium loti* MAFF303099; accession number NP\_106032), DbjA (Sato *et al.* 2005; *Bradyrhizobium japonicum* USDA110; accession number NP\_767727), DhmA (Jesenska *et al.* 2002; *Mycobacterium avium* N85; accession number AJ314789), DmbB (Jesenska *et al.* 2005; *Mycobacterium bovis* 5033/66; accession number AJ784273), DhlA (Keuning *et al.* 1985; *Xanthobacter autotrophicus* GJ10; accession number AAA88691), DrbA (Jesenska *et al.* 2009; *Rhodopirellula baltica* SH1; accession number AM696289), DmbC (Jesenska *et al.* 2009; *Mycobacterium bovis* 5033/66; accession number AM696288).

## References

- Jesenska, A., Bartos, M., Czernekova, V., Rychlik, I., Pavlik, I. and Damborsky, J.** (2002) Cloning and expression of the haloalkane dehalogenase gene *dhmA* from *Mycobacterium avium* N85 and preliminary characterization of DhmA. *Appl. Environ. Microbiol.* **68**, 3724-3730.
- Jesenska, A., Pavlova, M., Strouhal, M., Chaloupkova, R., Tesinska, I., Monincova, M., Prokop, Z., Bartos, M., Pavlik, I., Rychlik, I., Möbius, P., Nagata, Y. and Damborsky, J.** (2005) Cloning, biochemical properties, and distribution of mycobacterial haloalkane dehalogenases. *Appl. Environ. Microbiol.* **71**, 6736-6745.
- Jesenska, A., Monincova, M., Koudelakova, T., Hasan, K., Chaloupkova, R., Prokop, Z., Geerlof, A. and Damborsky, J.** (2009) Biochemical characterization of haloalkane dehalogenases DrbA and DmbC, representatives of a novel subfamily. *Appl. Environ. Microbiol.* **75**, 5157-5160.
- Keuning, S., Janssen, D. B. and Witholt, B.** (1985) Purification and characterization of hydrolytic haloalkane dehalogenase from *Xanthobacter autotrophicus* GJ10. *J. Bacteriol.* **163**, 635-639.
- Kulakova, A. N., Larkin, M. J. and Kulakov, L. A.** (1997) The plasmid-located haloalkane dehalogenase gene from *Rhodococcus rhodochrous* NCIMB 13064. *Microbiology* **143**, 109-115.
- Nagata, Y., Miyauchi, K., Damborsky, J., Manova, K., Ansorgova, A. and Takagi, M.** (1997) Purification and characterization of a haloalkane dehalogenase of a new substrate class from a gamma-hexachlorocyclohexane-degrading bacterium, *Sphingomonas paucimobilis* UT26. *Appl. Environ. Microbiol.* **63**, 3707-3710.
- Sato, Y., Monincova, M., Chaloupkova, R., Prokop, Z., Ohtsubo, Y., Minamisawa, K., Tsuda, M., Damborsky, J. and Nagata, Y.** (2005) Two rhizobial strains, *Mesorhizobium loti* MAFF303099 and *Bradyrhizobium japonicum* USDA110, encode haloalkane dehalogenases with novel structures and substrate specificities. *Appl. Environ. Microbiol.* **71**, 4372-4379.
